# Supplementary material for: Single-cell transcriptomics reveals multiple chemoresistant properties in leukemic stem and progenitor cells in pediatric AML
Source: PubMed Central journal article supplement (PMC10472599; doi:10.1186/s13059-023-03031-7), 2023-08-31

# Additional file 12. Uncropped western blot images

## Main Fig6a

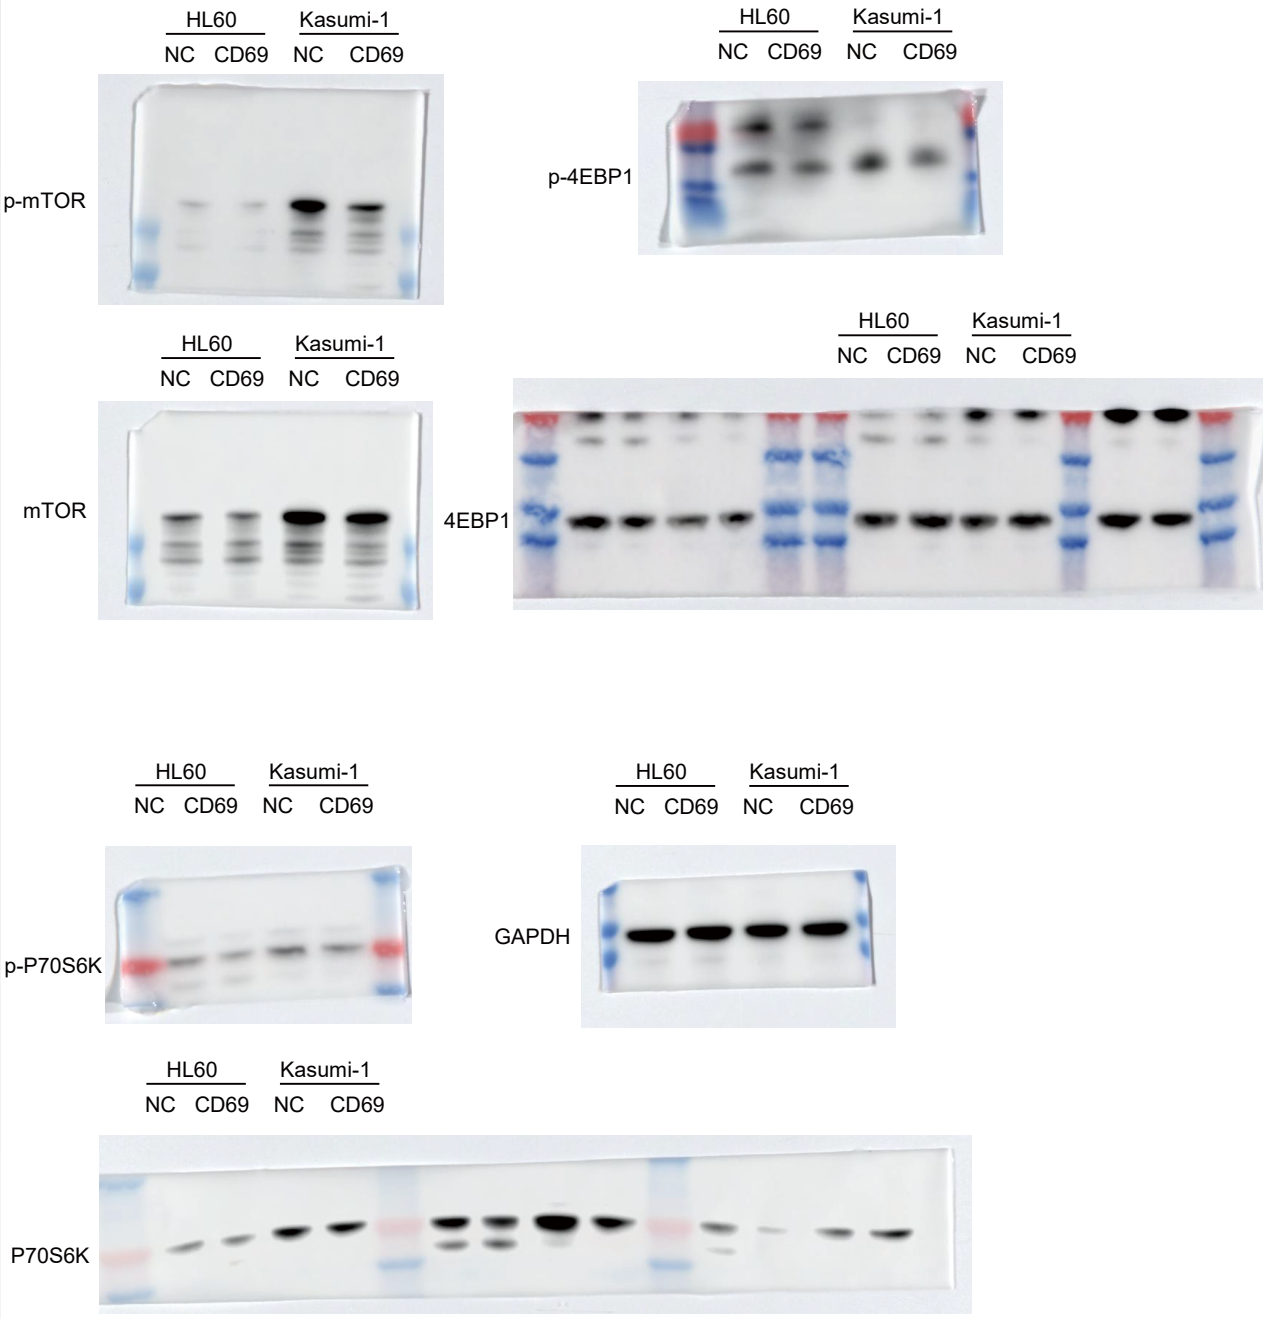

Main Fig6c

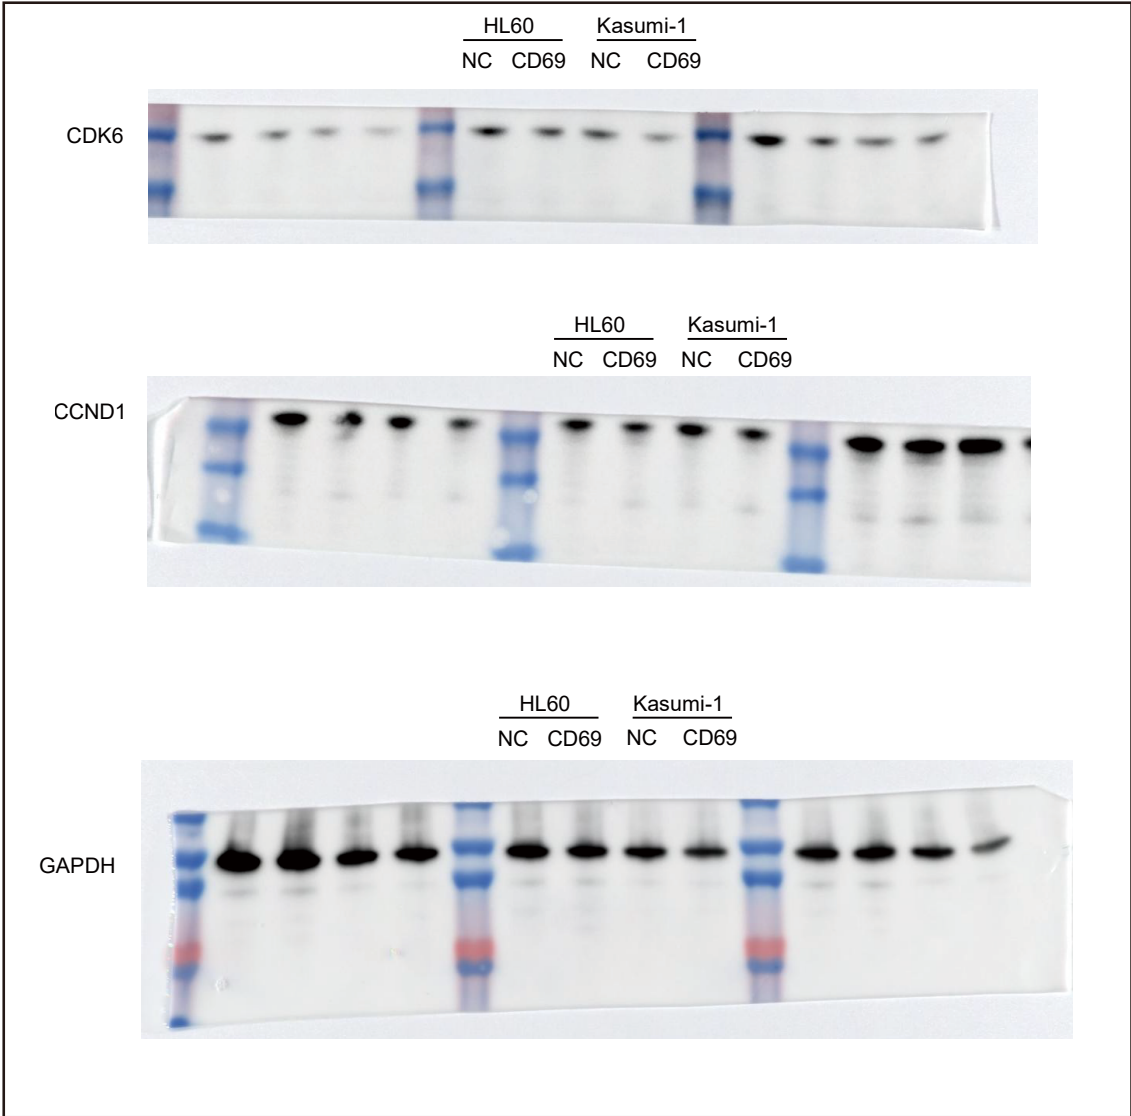

Supplement: 13059_2023_3031_MOESM12_ESM.pdf [file 13059_2023_3031_MOESM12_ESM.pdf]
